# Supplementary material
Source: Elsevier journal article supplement (https://comptes-rendus.academie-sciences.fr/biologies/article/10.1016/j.crvi.2014.09.006/file/attach/mmc2.pdf)
Supplement: mmc2 [file mmc2.pdf]

Appendix 2. Floristic inventories in the six studied temporary wetlands. The column ‘Ecology’ specifies temporary-wetland species (T), hydrophytic species (H), and opportunist species (O). The column ‘Life cycle’ indicates annual species (A) and perennial species (P). The column ‘Status’ indicates the rarity status according to our observations and to the synthesis by [Ghrabi-Gammar et al. \[36\]](#) (RR, very rare; R, rare; IF, infrequent), and the conservation status according to the IUCN Red List of North Africa ([\[73\]](#); CR, Critically Endangered; NT, Near Threatened; LC, Least Concern). EZZ, Ezzoubia; GGT, Garâa Guetma; GS1, Garâa Sejenane1; GS2, Garâa Sejenane2; GUE, Guetma; MCH, Majen Choucha.

| Taxon                                                                  | Synonym (s)                                      | Ecology | Life cycle | Status       | GUE | GS1 | EZZ | GS2 | GGT | MCH |
|------------------------------------------------------------------------|--------------------------------------------------|---------|------------|--------------|-----|-----|-----|-----|-----|-----|
| <i>Agrostis stolonifera</i> L.                                         |                                                  | O       | P          |              |     |     |     |     | x   |     |
| <i>Alisma lanceolatum</i> With.                                        | <i>Alisma plantago-aquatica</i>                  | H       | P          |              | x   | x   | x   | x   | x   | x   |
| <i>Alopecurus bulbosus</i> Gouan                                       |                                                  | O       | P          |              | x   | x   | x   | x   | x   |     |
| <i>Bellis annua</i> L.                                                 |                                                  | O       | A          |              | x   | x   | x   | x   |     | x   |
| <i>Bolboschoenus glaucus</i> (Lam.) S.G. Smith                         | <i>B. maritimus</i> , <i>Scirpus maritimus</i>   | H       | P          |              |     | x   | x   | x   | x   |     |
| <i>Callitriche brutia</i> Petagna                                      | <i>C. palustris</i> subsp. <i>pedunculata</i>    | H       | A          |              | x   |     | x   | x   | x   | x   |
| <i>Callitriche obtusangula</i> Le Gall                                 |                                                  | H       | A          |              |     |     | x   |     | x   | x   |
| <i>Carex divisa</i> Huds. subsp. <i>chaetophylla</i> (Steud.) Nyman    |                                                  | T       | P          |              |     |     |     | x   |     |     |
| <i>Carlina corymbosa</i> L. subsp. <i>corymbosa</i>                    | <i>Carlina racemosa</i>                          | O       | A          |              | x   |     |     |     |     |     |
| <i>Centaurea napifolia</i> L.                                          |                                                  | O       | A          |              | x   |     |     |     |     |     |
| <i>Chamaemelum fuscatum</i> (Brot.) Vasc.                              | <i>Anthemis praecox</i> , <i>Ormenis praecox</i> | O       | A          |              | x   | x   | x   | x   |     |     |
| <i>Chara commivens</i> Salzm. ex A. Br.                                |                                                  | H       | A          | RR           |     |     |     |     |     | x   |
| <i>Chara vulgaris</i> L.                                               |                                                  | H       | A          |              |     |     | x   |     |     |     |
| <i>Cichorium intybus</i> L.                                            |                                                  | O       | P          |              | x   |     | x   |     |     |     |
| <i>Convolvulus arvensis</i> L.                                         |                                                  | O       | A          |              |     |     |     | x   |     |     |
| <i>Corrigiola litoralis</i> L.                                         |                                                  | O       | A          |              |     |     |     |     |     | x   |
| <i>Cotula coronopifolia</i> L.                                         |                                                  | H       | A          |              | x   |     |     |     | x   | x   |
| <i>Crassula helmsii</i> (Kirck) Cockayne                               |                                                  | H       | P          | R-introduced |     |     |     |     | x   |     |
| <i>Cuscuta epithimum</i> L.                                            |                                                  | O       | A          |              | x   |     | x   | x   |     |     |
| <i>Cynodon dactylon</i> (L.) Pers.                                     |                                                  | O       | P          |              | x   |     | x   |     | x   | x   |
| <i>Cyperus longus</i> L. subsp. <i>badius</i> (Desf.) Bonnier & Layens |                                                  | H       | P          |              |     | x   | x   | x   |     | x   |
| <i>Damasonium bourgaei</i> Coss.                                       | <i>D. alisma</i> subsp. <i>bourgaei</i>          | T       | A          |              |     | x   |     |     |     |     |
| <i>Elatine alsinastrum</i> L.                                          |                                                  | H       | A          | RR-CR        |     |     |     |     |     | x   |
| <i>Elatine macropoda</i> Guss.                                         | <i>E. hydropper</i> , <i>E. campylosperma</i>    | T       | A          | R-NT         |     | x   |     |     | x   | x   |
| <i>Eleocharis palustris</i> (L.) Roem. & Schult.                       |                                                  | H       | P          |              | x   | x   | x   | x   | x   | x   |
| <i>Eryngium pusillum</i> L.                                            | <i>E. barlieri</i>                               | T       | A          |              | x   | x   |     |     | x   | x   |
| <i>Euphorbia prostrata</i> Aiton                                       |                                                  | O       | A          |              |     |     |     |     |     | x   |
| <i>Exaculum pusillum</i> (Lam.) Caruel                                 |                                                  | T       | A          | RR-NT        |     |     |     |     |     | x   |
| <i>Galium palustre</i> L. subsp. <i>elongatum</i> (C. Presl) Lange     |                                                  | H       | P          |              |     |     | x   |     |     | x   |
| <i>Glyceria spicata</i> (Biv.) Guss.                                   |                                                  | H       | P          |              | x   | x   | x   | x   | x   | x   |
| <i>Helosciadium crassipes</i> W.D.J. Koch ex Rchb.                     | <i>Apium crassipes</i>                           | T       | P          | IF-NT        |     |     | x   | x   | x   | x   |

| Taxon                                            | Synonym (s)                                    | Ecology | Life cycle | Status | GUE | GS1 | EZZ | GS2 | GGT | MCH |
|--------------------------------------------------|------------------------------------------------|---------|------------|--------|-----|-----|-----|-----|-----|-----|
| <i>Illecebrum verticillatum</i> L.               |                                                | T       | A          | IF-LC  |     |     |     |     |     | x   |
| <i>Isoetes velata</i> A. Br.                     |                                                | T       | P          | IF-LC  |     | x   | x   |     |     | x   |
| <i>Isolepis cernua</i> (Vahl.) Roemer & Schultes | <i>Scirpus savii</i> , <i>S. cernuus</i>       | O       | A          |        | x   | x   | x   |     |     | x   |
| <i>Juncus anceps</i> Laharpe                     |                                                | O       | P          |        |     |     | x   |     |     |     |
| <i>Juncus articulatus</i> L.                     |                                                | H       | P          |        | x   |     | x   |     |     |     |
| <i>Juncus bufonius</i> L.                        |                                                | O       | A          |        | x   | x   | x   |     |     |     |
| <i>Juncus conglomerates</i> L.                   |                                                | O       | P          |        |     |     | x   |     |     |     |
| <i>Juncus fontanesii</i> J. Gay ex Laharpe       |                                                | O       | P          |        | x   |     | x   |     |     |     |
| <i>Juncus heterophyllus</i> Dufour               |                                                | H       | P          |        |     |     | x   |     | x   | x   |
| <i>Juncus pygmaeus</i> Rich. ex Thuill.          |                                                | O       | A          | IF-LC  | x   | x   |     |     |     |     |
| <i>Juncus tenageia</i> Ehrh. ex L.f.             |                                                | O       | A          |        |     | x   |     |     |     |     |
| <i>Lolium perenne</i> L.                         |                                                | O       | A          |        | x   |     |     |     | x   |     |
| <i>Lotus hispidus</i> Desf. ex DC.               | <i>L. angustissimus</i> subsp. <i>hispidus</i> | O       | A          |        | x   | x   | x   | x   | x   | x   |
| <i>Lythrum borysthenticum</i> (Schränk) Litv.    | <i>L. nummularifolium</i>                      | T       | A          | R-LC   | x   |     | x   |     | x   | x   |
| <i>Lythrum hyssopifolia</i> L.                   |                                                | O       | A          |        | x   |     | x   | x   | x   | x   |
| <i>Lythrum junceum</i> Banks & Sol.              |                                                | O       | A          |        | x   |     | x   |     | x   | x   |
| <i>Lythrum portula</i> (L.) D.A. Webb            | <i>Peplis portula</i>                          | H       | A          |        |     |     |     |     |     | x   |
| <i>Lythrum tribracteatum</i> Salzm. ex Spreng.   | <i>L. bibracteatum</i>                         | T       | A          | R-LC   |     | x   |     | x   | x   |     |
| <i>Melilotus infestus</i> Guss.                  |                                                | O       | A          |        | x   |     |     |     | x   |     |
| <i>Mentha pulegium</i> L.                        |                                                | O       | P          |        | x   | x   | x   | x   | x   | x   |
| <i>Myosotis sicula</i> Guss.                     | <i>M. debilis</i>                              | T       | A          | R-NT   |     | x   |     | x   | x   | x   |
| <i>Myriophyllum alterniflorum</i> DC.            |                                                | H       | A          | RR-LC  |     |     |     |     |     | x   |
| <i>Nitella opaca</i> (Bruz.) Ag.                 |                                                | H       | A          | IF     | x   |     | x   |     | x   | x   |
| <i>Nitella translucens</i> (Pers.) Ag.           |                                                | H       | A          | IF     |     |     |     |     | x   | x   |
| <i>Oenanthe fistulosa</i> L.                     |                                                | T       | P          |        |     | x   | x   | x   |     |     |
| <i>Oenanthe silaifolia</i> M. Bieb.              |                                                | T       | P          |        | x   | x   | x   | x   |     |     |
| <i>Oenanthe virgata</i> Poir.                    |                                                | T       | P          |        |     |     |     |     | x   |     |
| <i>Panicum repens</i> L.                         |                                                | O       | P          |        |     |     |     |     | x   |     |
| <i>Paronychia echinulata</i> Chater              |                                                | O       | A          |        | x   |     |     |     |     |     |
| <i>Paspalum distichum</i> L.                     |                                                | T       | P          |        |     |     | x   |     |     |     |
| <i>Pilularia minuta</i> Durieu                   |                                                | T       | A          | R-CR   |     | x   |     |     | x   |     |
| <i>Plantago coronopus</i> L.                     |                                                | O       | A          |        | x   |     |     |     |     | x   |
| <i>Polycarpon tetraphyllum</i> (L.) L.           |                                                | O       | A          |        | x   |     |     |     |     |     |
| <i>Pulicaria sicula</i> (L.) Moris               |                                                | O       | A          |        | x   |     | x   |     |     |     |
| <i>Ranunculus baudotii</i> Godr.                 | <i>R. peltatus</i>                             | H       | A          |        | x   | x   | x   | x   | x   | x   |
| <i>Ranunculus ophioglossifolius</i> Vill.        |                                                | T       | A          | IF-LC  |     | x   | x   | x   | x   | x   |
| <i>Ranunculus sardous</i> Crantz.                |                                                | O       | A          |        | x   | x   | x   | x   | x   | x   |
| <i>Rumex bucephalophorus</i> L.                  |                                                | O       | A          |        | x   |     |     |     |     |     |

| <b>Taxon</b>                               | <b>Synonym (s)</b>       | <b>Ecology</b> | <b>Life cycle</b> | <b>Status</b> | <b>GUE</b> | <b>GS1</b> | <b>EZZ</b> | <b>GS2</b> | <b>GGT</b> | <b>MCH</b> |
|--------------------------------------------|--------------------------|----------------|-------------------|---------------|------------|------------|------------|------------|------------|------------|
| <i>Rumex crispus</i> L.                    |                          | O              | P                 |               | x          |            | x          |            |            |            |
| <i>Rumex pulcher</i> L.                    |                          | O              | P                 |               | x          |            | x          | x          | x          | x          |
| <i>Rumex tunetanus</i> Barratte & Murb.    |                          | T              | P                 | RR-CR         |            | x          |            | x          |            |            |
| <i>Schoenoplectus lacustris</i> (L.) Palla | <i>Scirpus lacustris</i> | H              | P                 |               |            |            |            |            | x          |            |
| <i>Trifolium filiforme</i> L.              | <i>T. micranthum</i>     | O              | A                 |               | x          | x          |            |            | x          |            |
| <i>Trifolium fragiferum</i> L.             |                          | O              | A                 |               |            |            | x          |            | x          |            |
| <i>Trifolium michelianum</i> Savi          |                          | O              | A                 |               |            |            |            |            | x          |            |
| <i>Trifolium nigrescens</i> Viv.           |                          | O              | A                 |               | x          |            | x          | x          | x          |            |
| <i>Trifolium resupinatum</i> L.            |                          | O              | A                 |               | x          | x          | x          | x          | x          |            |
| <i>Vulpia myuros</i> (L.) C.C. Gmel        |                          | O              | A                 |               | x          |            | x          |            |            |            |
| <i>Zannichellia palustris</i> L.           |                          | H              | P                 |               | x          |            |            |            | x          |            |
